# Supplementary material for: The Swedish vascular registry Swedvasc 1987–2018
Source: Springer Nature journal article supplement (doi:10.1007/s00772-018-0473-x), 2018-11-16
Supplement: MOESM1 [file 16275776]

## Papers published in the name of Swedvasc

Impact of Comorbidity, Medication, and Gender on Amputation Rate Following Revascularisation for Chronic Limb Threatening Ischaemia. Baubeta Fridh E, Andersson M, Thuresson M, Sigvant B, Kragsterman B, Johansson S, Hasvold P, Nordanstig J, Falkenberg M. Eur J Vasc Endovasc Surg. 2018 Aug 6. pii: S1078-5884(18)30352-6. doi: 10.1016/j.ejvs.2018.06.003

The Vascunet Report on Amputations: Does it Contribute? Norgren L. Eur J Vasc Endovasc Surg. 2018 Sep;56(3):400. doi: 10.1016/j.ejvs.2018.05.016. Epub 2018 Jun 13

International Variations in Amputation Practice: A VASCUNET Report. Behrendt CA, Sigvant B, Szeberin Z, Beiles B, Eldrup N, Thomson IA, Venermo M, Altreuther M, Menyhei G, Nordanstig J, Clarke M, Rieß HC, Björck M, Debus ES. Eur J Vasc Endovasc Surg. 2018 Sep;56(3):391-399

Treatment of aortic aneurysms registered in Swedvasc: Development reflected in a national vascular registry with an almost 100% coverage. Bergqvist D, Mani K, Troëng T, Wanhainen A. Gefasschirurgie. 2018;23(5):340-345.. Epub 2018 Aug 13. Review.

Open or endovascular revascularization in the treatment of acute lower limb ischaemia. Grip O, Wanhainen A, Michaëlsson K, Lindhagen L, Björck M. Br J Surg. 2018 Jul 25

Editor's choice - The impact of centralization and endovascular aortic repair on treatment of ruptured abdominal aortic aneurysms based on international registries Budtz-Lilly J, Björck M, Venermo M, Debus S, Behrendt C-A, Altreuther M, Beiles B, Szeberin Z, Eldrup N, Danielsson G, Thomson I, Wigger P, Khashram M, Loftus I, Mani K.. Eur J Vasc Endovasc Surg 2018 Aug;56(2):181-188.

International Consortium of Vascular Registries Consensus Recommendations for Peripheral Revascularisation Registry Data Collection Behrendt, C. A., D. Bertges, N. Eldrup, A. W. Beck, K. Mani, M. Venermo, Z. Szeberin, G. Menyhei, I. Thomson, G. Heller, P. Wigger, G. Danielsson, G. Galzerano, C. Lopez, M. Altreuther, B. Sigvant, H. C. Riess, A. Sedrakyan, B. Beiles, M. Björck, J. R. Boyle, E. S. Debus and J. Cronenwett.. Eur J Vasc Endovasc Surg. doi:10.1016/j.ejvs.2018.04.006

Ruptured popliteal artery aneurysm. Cervin A, Ravn H, Björck M. Br J Surg. 2018 Jul 24. doi: 10.1002/bjs.10953

Popliteal Artery Aneurysm in Women\_ Ravn H, Pansell-Fawcett K, Björck M. Eur J Vasc Endovasc Surg. 2017 Dec;54(6):738-74

Amputation Rates, Mortality, and Pre-operative Comorbidities in Patients Revascularised for Intermittent Claudication or Critical Limb Ischaemia: A Population Based Study. Baubeta Fridh E, Andersson M, Thuresson M, Sigvant B, Kragsterman B, Johansson S, Hasvold P, Falkenberg M, Nordanstig J. Eur J Vasc Endovasc Surg. 2017 Oct;54(4):480-486. doi: 10.1016/j.ejvs.2017.07.005. Epub 2017 Aug 7

Editor's Choice -Dual Antiplatelet Therapy Improves Outcome in Diabetic Patients Undergoing Endovascular Femoropopliteal Stenting for Critical Limb Ischaemia. Tott O, Granath F, Malmstedt J, Wahlgren C-M. J Vasc Endovasc Surg. 2017 March (2017) 53, 403-410

Outcome After Ruptured AAA Repair in Octo- and Nonagenarians in Sweden 1994-2014 . Sonesson B , Björkes K , Dias N, Rylance R, Mani K, Wanhainen A, Resch T. Eur J Vasc Endovasc Surg (2017) 53, 656-662.

The impact of centralization and endovascular aortic repair on treatment of ruptured abdominal aortic aneurysms based on international registries. Budtz-Lilly J, Björck M, Venermo M, Debus S, Behrendt C-A, Altreuther M, Beiles B, Szeberin Z, Eldrup N, Danielsson G, Thomson I, Wigger P, Khashram M, Loftus I, Mani K. Editor's choice -. Eur J Vasc Endovasc Surg 2018 Aug;56(2):181-188.

Assessment of Minimum Important Difference and Substantial Clinical Benefit with the Vascular Quality of Life Questionnaire-6 when Evaluating Revascularisation Procedures in Peripheral Arterial Disease. Nordanstig J, Pettersson M, Morgan M, Falkenberg M, Kumlien C. Eur J Vasc Endovasc Surg. 2017 Sep;54(3):340-347.

The Impact of Initial Misdiagnosis of Ruptured Abdominal Aortic Aneurysms on Lead Times, Complication Rate, and Survival. Smidfelt K, Drott C, Törngren K, Nordanstig J, Herlitz J, Langenskiöld M. Eur J Vasc Endovasc Surg. 2017 May 16

Editor's choice -Assessment of international outcomes of intact abdominal aortic aneurysm repair over 9 years. Budtz-Lilly J, Venermo M, Debus S, Behrendt C-A, Altreuther M, Beiles B, Szeberin Z, Eldrup N, Danielsson G, Thomson I, Wigger P, Björck M, Loftus I, Mani K.. Eur J Vasc Endovasc Surg 2017; 54: 13-20

Editor's Choice - Trend-break in Abdominal Aortic Aneurysm Repair With Decreasing Surgical Workload. Lilja F, Mani K, Wanhainen A. *Eur J Vasc Endovasc Surg.* 2017 Jun;53(6):811-819

Editor's choice: Carotid Stenosis Treatment: Variation in International Practice Patterns Venermo M, Wang G, Sedrakyan A, Mao J, Eldrup N, DeMartino R, Mani K, Altreuther M, Beiles B, Menyhei G, Danielsson G, Thomson I, Heller G, Setacci C, Björck M\*, Cronenwett J\*. *Eur J Vasc Endovasc Surg.* 2017; 53: 511-519

Few Internal Iliac Aneurysms Rupture under 4 cm Laine M, Björck M, Beiles B, Szeberin Z, Thomson I, Altreuther M, Debus S, Mani K, Menyhei G, Venermo M.. *J Vasc Surg* 2017; 65: 76-81

Nationwide Study of the Treatment of Mycotic Abdominal Aortic Aneurysms Comparing Open and Endovascular Repair. Sörelius K, Wanhainen A, Furebring M, Björck M, Gillgren P, Mani K; Swedish Collaborator Group for Mycotic Abdominal Aortic Aneurysms\*. *Circulation.* 2016 Dec 6;134(23):1822-1832

Contemporary cardiovascular risk and secondary preventive drug treatment patterns in peripheral artery disease patients undergoing revascularization. Sigvant B, Kragsterman B, Falkenberg M, Hasvold P, Johansson S, Thuresson M, Nordanstig J. *J Vasc Surg.* 2016 Oct;64(4):1009-1017.e3. doi: 10.1016/j.jvs.2016.03.429. Epub 2016 May 18

Patient Experiences of Life Years After Severe Civilian Lower Extremity Trauma With Vascular Injury. Bernhoff K, Björck M, Larsson J, Jangland E. *Eur J Vasc Endovasc Surg.* 2016 Nov;52(5):690-695

Outcome for Endovascular and Open Procedures in Infrapopliteal Lesions for Critical Limb Ischemia: Registry Based Single Center Study. Gentile F, Lundberg G, Hultgren R. *Eur J Vasc Endovasc Surg.* 2016 Nov;52(5):643-649

Editor's Choice - Abdominal Compartment Syndrome After Surgery for Abdominal Aortic Aneurysm: A Nationwide Population Based Study. Ersryd S, Djavani-Gidlund K, Wanhainen A, Björck M. *Eur J Vasc Endovasc Surg.* 2016 Aug;52(2):158-65

Long-Term Outcome After Carotid Artery Stenting: A Population-Based Matched Cohort Study. Jonsson M, Lindström D, Gillgren P, Wanhainen A, Malmstedt J. *Stroke.* 2016 Aug;47(8):2083-9

Cost-effectiveness of Screening for Abdominal Aortic Aneurysm in Combination with Medical Intervention in Patients with Small Aneurysms M. Zarrouk, A Lundqvist, J. Holst a, T. Troëng, A Gottsäter Eur J Vasc Endovasc Surg (2016) 51, 766 e773

Comparison of long-term mortality after ruptured abdominal aortic aneurysm in England and Sweden. Karthikesalingam, A. Wanhainen, P. J. Holt, A. Vidal-Diez, J. R. W. Brownrigg, I. Shpitser, M. Björck, M. M. Thompson and K. Mani Br J of Surg 2016 Feb;103:199-206

Revisiting the cost-effectiveness of screening 65-year-old men for abdominal aortic aneurysm based on data from an implemented screening programme. Hager J, Henriksson M, Carlsson P, Länne T, Lundgren F. Int Angiol. 2017 Dec;36(6):517-525. doi: 10.23736/S0392-9590.16.03777-9. Epub 2016 Dec 1.

International Consortium of Vascular Registries. Variations in abdominal aortic aneurysm care: a report from the International consortium of vascular registries. Beck AW, Sedrakyan A, Mao J, Venermo M, Faizer R, Debus S, Behrendt CA, Scali ST, Altreuther M, Schermerhorn M, Beiles B, Szeberin Z, Eldrup N, Danielsson G, Thomson I, Wigger PF, Björck M, Cronenwett JL, Mani K,. Circulation 2016 Dec 13; 134: 1948-1958

Quality Improvement in Vascular Surgery: The Role of Comparative Audit and Vascunet. Vascunet Collaboration, Mitchell D, Venermo M, Mani K, Björck M, Troeng T, Debus S, Szeberin Z, Hansen AK, Beiles B, Setacci C, Bergqvist D, Menyhei G, Heller G, Danielsson G, Loftus I, Thomson I, Vogt K, Jensen L, Altreuther M, Eldrup N, Wigger P, Moreno-Carriles R, Lees T. Eur J Vasc Endovasc Surg. 2015 Jan;49(1):1-3

Editor's Choice e Durability of Endovascular Repair in Blunt Traumatic Thoracic Aortic Injury: Long-Term Outcome from Four Tertiary Referral Centers J. Steuer , M. Björck , B. Sonesson , T. Resch , N. Dias , R. Hultgren , R. Tunesi , A. Wanhainen , M. Lachat ,T. Pfammatter. Eur J Vasc Endovasc Surg (2015) 50, 460e465

Management and outcome of pediatric vascular injuries. Wahlgren CM, Kragsterman B. J Trauma Acute Care Surg. 2015 Oct;79(4):563-7.

Regional Differences in Case Mix and Peri-operative Outcome After Elective Abdominal Aortic Aneurysm Repair in the Vascunet Database. Mani K, Venermo M, Beiles B, Menyhei G, Altreuther M, Loftus I, Björck M. Eur J Vasc Endovasc Surg. 2015 Jun;49(6):646-52.

International Vascunet Validation of the Swedvasc Venermo M, Lees T. Registry Eur J Vasc Endovasc Surg. 2015 Aug 31.S1078-5884

Treatment of Popliteal Aneurysm by Open and Endovascular Surgery: A Contemporary Study of 592 Procedures in Sweden Cervin A, Tjärnström J, Ravn H, Acosta S, Hultgren R, Welander M, Björck M  
Eur J Vasc Endovasc Surg. 2015 Sep;50(3):342-50.

Peri-procedural Risk with Urgent Carotid Artery Stenting: A Population based Swedvasc Study  
Jonsson M, Gillgren P, Wanhainen A, Acosta S, Lindström D  
Eur J Vasc Endovasc Surg. 2015 May;49(5):506-12.

Iatrogenic popliteal artery injury in non arthroplasty knee surgery Bernhoff K, Björck M.  
Bone Joint J 2015 Feb;97-B(2):192-6.

Preoperative hypofibrinogenemia is associated with increased intraoperative bleeding in ruptured abdominal aortic aneurysms Montán C, Johansson F, Hedin U, Wahlgren CM  
Thromb Res. 2014 Oct 20; S0049-3848(14)

Low Post-operative Mortality after Surgery on Patients with Screening-detected Abdominal Aortic Aneurysms: A Swedvasc Registry Study A. Linné, K. Smidfelt, M. Langenskiöld, R. Hultgren, J. Nordanstig, B. Kragsterman, D. Lindström. Eur J Vasc Endovascular Surgery 2014 Dec; 48 (6): 649-656

Sex differences in the association between smoking and abdominal aortic aneurysm. Stackelberg O, Björck M, Larsson SC, Orsini N, Wolk A. Br J Surg. 2014 Sep;101(10):1230-7

Alcohol consumption, specific alcoholic beverages, and abdominal aortic aneurysm. Stackelberg O, Björck M, Larsson SC, Orsini N, Wolk A. Circulation 2014 Aug 19;130(8):646-52

Invasive Treatment for Infrainguinal Claudication Has Satisfactory 1 Year Outcome in Three out of Four Patients: A Population-based Analysis from Swedvasc. H. Lindgren, A. Gottsäter, P. Qvarfordt, S. Bergman, T. Troëng Eur J Vasc Endovasc Surg 2014 Jun;47(6):615-20

Outcome and complications after intra-arterial thrombolysis for lower limb ischaemia with or without continuous heparin infusion O. Grip, M. Kuoppala, S. Acosta, A. Wanhainen, J. Åkeson and M. Björck. Br J Surg 2014 Aug;101(9):1105-12. Epub 2014 Jun 25

Carotid Artery Atherosclerosis Among 65-year-old Swedish Men D Högberg ,B. Kragsterman M. Björck, J. Tjärnström, A. Wanhainen.. Eur J Vasc Endovasc Surg. 2014 Jul;48(1):5-10

Invasive Treatment for Infrainguinal Claudication Has Satisfactory 1 Year Outcome in Three out of Four Patients: A Population-based Analysis from Swedvasc Lindgren H, Gottsäter A, Qvarfort P, Bergman S, Troëng T, Eur J Vasvc Endovasc Surg 2014 June; 47(6): 615–620

Poplitea Artery Injury During Knee Replacement; a population based nation wide study. Bernhoff K, Rudström H, Gedeborg R, Björk M. Bone Joint J 2014 Dec: 95-B(12):1645-9

Health-associated Infections After Lower Extremity Revascularization Daryapeyma A, Ostlund O, Wahlgren CM.. Eur J Vasvc Endovasc Surg 2014 Mar 6

Editor's choice: Contemporary treatment of popliteal artery aneurysm in eight countries - A report from the VASCUNET collaboration of registries. Björck M, Beiles B, Menyhei G, Thomson I, Wigger P, Venermo M, Laxdal E, Danielsson G, Lees T, Troëng T.. Eur J Vasc Endovasc Surg 2014, 47; 164-171

Urgent Carotid Surgery and Stenting May be Safe After Systemic Thrombolysis for Stroke. Koraen-Smith L, Troëng T, Björck M, Kragsterman B, Wahlgren C-M. Stroke. 2014;45:00-00.

Editor's choice - Safety of carotid endarterectomy after intravenous thrombolysis for acute ischaemic stroke: A case-controlled multicentre registry study. Rathenborg LK, Venermo M, Troëng T, Jensen LP, Vikatmaa P, Wahlgren C, Ijäs P, Björck M, Kragsterman B.. Eur J Vasc Endovasc Surg 2014; 48: 620-625

Validation of the VASCUNET registry – a pilot study. Bergqvist D, Björck M, Lees T, Menyhei G.. VASA 2014; 43: 141-144

National Experience with Extracranial Carotid Artery Aneurysms: Epidemiology, Surgical Treatment Strategy, and Treatment Outcome Nordanstig J, Gelin J, Jensen N, Osterberg K, Strömberg S. Ann Vasc Surg 2013;-: 1–5

Vascular Quality of Life Questionnaire-6 facilitates health-related quality of life assessment in peripheral arterial disease Nordanstig J, Wann\_Hansson C, Karlsson J, Lundström M, Pettersson M, Morgan M J Vasc Surg 2013; 18:1-8

Lower Prevalence than Expected when Screening 70-year-old Men for Abdominal Aortic Aneurysm Hager J, Länne T, Carlsson P, Lundgren F.. Eur J Vasc Endovasc Surg. 2013 Oct;46(4):453-9

A. Percutaneous Closure of Large Femoral Artery Access with Prostar XL in Thoracic Endovascular Aortic Repair Skagius E, Bosnjak M, Björck M, Steuer J, Nyman R, Wanhainen. *Eur J Vasc Endovasc Surg* 2013 Nov;46(5):558-63

Fruit and vegetable consumption with risk of abdominal aortic aneurysm Stackelberg O, Björck M, Larsson SC, Orsini N, Wolk. *Circulation*. 2013 Aug 20;128(8):795-802

Population-based survival rate with a one- or two-stop referral pattern for patients with ruptured abdominal aortic aneurysms Hager J, Lundgren F. *Int Angiol*. 2013 Oct;32(5):492-500.

Changes in the management of infrarenal abdominal aortic aneurysm disease in Sweden Mani K, Björck M, Wanhainen A. *Br J Surg*. 2013 Apr;100(5):638-44.

Nationwide experience of cardio- and cerebrovascular complications during infrainguinal endovascular intervention for peripheral arterial disease and acute limb ischaemia. Nordanstig J, Smidfelt K, Langenskiöld M, Kragsterman B. *Eur J Vasc Endovasc Surg*. 2013 Mar;45(3):270-4

Very urgent carotid endarterectomy confers increased procedural risk Strömberg S, Gelin J, Osterberg T, Bergström GM, Karlström L, Osterberg K; Swedish Vascular Registry (Swedvasc) Steering Committee. *Stroke*. 2012 May;43(5):1331-5

Outcome after 7 years of carotid artery stenting and endarterectomy in Sweden - single centre and national results Lindström D, Jonsson M, Formgren J, Delle M, Rosfors S, Gillgren P. *Eur J Vasc Endovasc Surg*. 2012 May;43(5):499-503.

International Variations in Infrainguinal Bypass Surgery – A VASCUNET report. Lees T, Troëng T, Thomson IA, Menyhei G, Simo G, Beiles B, Jensen LP, Palombo D, Venermo M, Mitchell D, Halbakken E, Wigger P, Heller G, Björck M. *Eur J Vasc Endovasc Surg* 2012; 44: 185-192

Variation in clinical practice in carotid surgery in 9 countries 2005-2010. Lessons from VASCUNET and recommendations for the future of national clinical audit Vikatmaa P, Mitchell D, Jensen LP, Beiles B, Björck M, Halbakken E, Lees T, Menyhei G, Palombo D, Troeng T, Wigger P, Venermo M. *Eur J Vasc Endovasc Surg* 2012; 44: 11-17

Treatment of Abdominal Aortic Aneurysm in Nine Countries 2005-2009: A Vascunet Report Mani K, Lees T, Bailes B, Jensen LP, Venermo M, Simo G, Palombo D, Halbakken E, Troëng T, Wigger P, and Björck M.. Eur J Vasc Endovasc Surg 2011; 42: 598-607

Cost-effectiveness of intensive smoking cessation therapy among patients with small abdominal aortic aneurysms Mani K, Wanhainen A, Lundkvist J, Lindström D.. J Vasc Surg. 2011 May 25.

Insurance Claims after Vascular Surgery in Sweden Rudström H, Bergqvist D, Ahlberg J, Björck M.. Eur J Vasc Endovasc Surg. 2011;42: 498-505

Treatment of Abdominal Aortic Aneurysm in Nine Countries 2005-2009: A Vascunet Report Mani K, Lees T, Bailes B, Jensen LP, Venermo M, Simo G, Palombo D, Halbakken E, Troëng T, Wigger P, and Björck M.. Eur J Vasc Endovasc Surg 2011; 42: 598-607

PTFE Bypass to Below-knee Arteries: Distal Vein Collar or Not? A Prospective Randomised Multicentre Study – SCAMICOS Lundgren F.. Eur J Vasc Endovasc Surg 2010;37:747-54

Outcome after nitinol stenting in the superficial femoral and popliteal artery in an elderly population Gillgren P, Pettersson H, Fernström J, Falkenberg M, Delle M, Konrad P, Lindström D .. Ann Vasc Surg. 2011 Aug;25(6):758-65.

Outcome following carotid endarterectomy: lessons learned from a large international vascular registry. Menyhei G, Björck M, Bailes B, Halbakken E, Jensen LP, Lees T, Palombo D, Thomson IA, Venermo M, Wigger P.. Eur J Vasc Endovasc Surg 2011; 41: 735-740

M. Endovascular and open surgery for acute occlusion of the superior mesenteric artery Block TA, Acosta S, Björck. J Vasc Surg 2010; 52:959-66

Improved Long-Term Survival After Abdominal Aortic Aneurysm Repair Mani K, Björck M, Lundkvist J, Wanhainen A. Circulation 2009;120:201-211.

Vascular surgery in Sweden as reflected in the Swedish Vascular Registry Swedvasc. Bergqvist D, Björck M, Troeng T. Angiol Sosud Khir 2009; 15: 94-100.

Time-trends in vascular access surgery in Sweden 1987-2006 Ljungström KG, Troëng T, Björck M.. Eur J Vasc Endovasc Surg 2008;36:592-6.



The value of a nationwide vascular registry in understanding contemporary time trends of abdominal aortic aneurysm repair Wanhainen A, Mani K, Björck M. *Scand J Surg* 1.

External validation of the Swedvasc registry. A first-time individual cross-matching with the unique personal identity number Troëng T, Malmstedt J, Björck M. *Eur J Vasc Endovasc Surg* 2008; 36: 705-712

Outcomes of Endovascular Abdominal Aneurysm Repair compared to Open surgical Repair in high-risk patients: Results from the Swedish Vascular Registry Wahlgren CM, Malmstedt J.. *J Vasc Surg* 2008;48(6):1382-8.

Outcome after leg bypass surgery for critical limb ischemia is poor in patients with diabetes: a population-based cohort study Malmstedt J, Leander K, Wahlberg E, Karlström L, Alfredsson L, Swedenborg J.. *Diabetes Care*. 31:887–892, 2008.

Invasive treatment for renovascular disease –a twenty year experience from a population based registry Bergqvist D, Björck M, Troëng T.. *J Cardiovasc Surg* 2008; 49:559-63

External validation of the Swedvasc registry. A first-time individual cross-matching with the unique personal number Troëng T, Malmstedt J, Björck M.. *Eur J Vasc Endovasc Surg* 2008;36(6):705-12.

Abdominal aortic aneurysm repair in Sweden. Improved outcome over time 1994-2005 Wanhainen A, Bylund N, Björck M. *Br J Surg* 2008;95:564-570.

Invited commentary: “Are Adverse Events After Carotid Endarterectomy Reported Comparably In Different Registries?” Björck M, Taha AG, Vikatmaa P, Albäck A, Aho PS, Railo M and Lepäntalo M. *Eur J Vasc Endovasc Surg* 2008; 35: 286-287

Iatrogenic vascular injuries in Sweden. A Nationwide Study 1987-2005 Rudström H, Bergqvist D, Ögren M, Björck M.. *Eur J Vasc Endovasc Surg* 2008; 35:131-138.

Twenty years with the Swedvasc Registry (Editorial). Björck M, Bergqvist D, Eliasson K, Jansson I, Karlström L, Kragsterman B, Lundell A, Malmstedt J, Nordanstig J, Norgren L, Troëng T. Eur J Vasc Endovasc Surg 2008;35:129-130.

Cost-effectiveness of endarterectomy in patients with asymptomatic carotid artery stenosis in Sweden Henriksson M, Lundgren F, Carlsson P. Br J Surg. 2008 Jun;95(6):714-20.

High risk to develop new aneurysms after surgery for popliteal artery aneurysm Ravn H, Wanhainen A, Björck M.. Br J Surg .2008;95:571-575.

Similar cost for open and endovascular elective repair of abdominal aortic aneurysm in a population-based setting Mani K, Björck M, Lundkvist J, Wanhainen A.. J Endovasc Ther 2008; 15: 1-11.

Second vascular surgery database report 2008. Gibbons C, Björck M, Jensen LP, Laustsen J, Lees T, Moreno-Carriles R, Troëng T, Wigger P, Beiles B, Thomsen I, Venermo M, Menyhei G, Palombo D, Halbakken E.. European Society of Vascular Surgery. ISBN 1- 903968-21-6

Surgical technique and long-term results after popliteal artery aneurysm repair: Results from 717 operated legs Ravn H, Wanhainen A, Björck M.. J Vasc Surg 2007; 46:236-243

Popliteal artery aneurysm with acute ischemia in 229 patients. Outcome after thrombolytic and surgical therapy Ravn H, Björck M.. Eur J Vasc Endovasc Surg 2007; 33:690-695.

Nationwide study of the outcome of popliteal artery aneurysms treated surgically Ravn H, Bergqvist D, Björck M. Br J Surg 2007;94:970-977.

The first Vascunet report on Abdominal Aortic Aneurysm surgery, 2007 Gibbons C, Björck M, Jensen LP, Laustsen J, Lees T, Moreno-Carriles R, Troëng T, Wigger P. European Society of Vascular Surgery. ISBN 1- 903968-17-8

Long-term survival after carotid endarterectomy for asymptomatic stenosis Kragsterman B, Björck M, Lindbäck J, Bergqvist D, Pärsson H. Stroke 2006;37:2886-2891.

Outcomes of carotid endarterectomy for asymptomatic stenosis in Sweden are improving— results from a population based registry Kragsterman B, Pärsson H, Bergqvist D, Björck M.. J Vasc Surg 2006; 44: 79-85.

Cost-effectiveness of Screening Women for Abdominal Aortic Aneurysm Wanhainen A, Lundkvist J, Bergqvist D, Björck M. J Vasc Surg 2006; 43: 908-914.

Decision-analytical model with lifetime estimation of costs and Health outcomes for one-time screening for abdominal aortic aneurysm in 65-year-old men. Henriksson M, Lundgren F. Br J Surg 2005;92:976-983.

Cost-effectiveness of different screening strategies for abdominal aortic aneurysm Wanhainen A, Lundkvist J, Bergqvist D, Björck M. J Vasc Surg 2005; 41: 741-751.

Long term results of above knee femoro-popliteal bypass depend on indication and graft-material Berglund J, Björck M, Elfström J and on behalf of the SWEDVASC Femoro-popliteal Study Group. Eur J Vasc Endovasc Surg 2005;29:412-418.

Can Low Molecular Weight Heparin Replace Unfractionated Heparin During Peripheral Arterial Reconstruction ? An Open Label Prospective Randomized Controlled Trial Norgren L for the Swedish EnoxVasc Study Group. J Vasc Surg 2004; 39:977-84.

Risk factors for complications after carotid endarterectomy – a population based study. Kragsterman B, Logason K, Ahari A, Troëng T, Pärsson H, Bergqvist D. Eur J Vasc Endovasc Surg 2004;28:98-103

Ankle-brachial Index and Mortality in a Cohort of Questionnaire Recorded Leg Pain on Walking Jönsson B, Skau T. Eur J Vasc Endovasc Surg 2002;24:405-410.

The European Experience with Vascular Injuries Fingerhut A, Takolander R et al. Surg Clin North Am 2002;82:175-188.

Revascularisation of the Superior Mesenteric Artery after Acute Thromboembolic Occlusion Björck M, Acosta S, Lindgren F, Troëng T, Bergqvist D. Br J Surg 2002;89(7):923-7.

Low molecular weight heparin (enoxaparin) versus dextran in the prevention of early occlusion following arterial bypass surgery distal to the groin Logason K, Bergqvist D. Eur J Vasc Endovasc Surg 2001;21:261-65.

Diabetes mellitus as a risk factor for early outcome after carotid endarterectomy – a population-based study Ahari A, Bergqvist D, Troëng T, Elfstrom J, Hedberg B, Ljungstrom K, Norgren L, Örténwall P..Eur J Vasc Endovasc Surg 1999;18:122-126.

Complications after carotid endarterectomy are related to surgical errors in less than one fifth of cases. Troëng T, Bergqvist D, Norrving B, Ahari A. Eur J Vasc Endovasc Surg 1999;18:59-64.

Risk-factors for postoperative intestinal ischaemia after aortoiliac surgery. A combined cohort and case-control study of 2824 operations. Björck M, Bergqvist D, Troëng T. Eur J Vasc Endovasc Surg 1997;13:531-539.

Reoperations, Redo Surgery and Other Site Interventions constitute more than one third of Vascular Surgery. A study from Swedvasc - The Swedish Vascular Registry Troëng T et al.. Eur J Vasc Endovasc Surg 1997;14:244-251

Patients not included in medical audit have a worse outcome than those included.Int J of Quality Assurance Elfström J, Stubberöd A, Troëng T. 1996;8:153-157.

Adjusting outcome measurements for casemix in a vascular registry - is it possible and desirable?. Elfström J,Stubberöd A, Troëng T. Eur J Vasc Endovasc Surg 1996;12:459-463.

Operations, in-hospital length of stay and costs in 321 patients with critical leg ischaemia. A population-based longitudinal outcome study Eneroth M, Apelqvist J, Troëng T, Persson BM.. Acta Ortop Scand 1996;67(5):459-65.

Incidence and clinical presentation of bowel ischaemia after 2930 aortoiliac operations in Sweden Björck M, Bergqvist D,Troëng T.. Eur J Vasc Endovasc Surg 1996;12:139-144

Swedvasc. Vascular surgical audit during a five year period. Changing patterns of vascular surgery 1987-1991. Eur J Vasc Surg 1994;8:472-477.

The incidence and causes of adverse outcomes of operation for chronic ischemia of the leg. Troëng T,Bergqvist D,Janzon L. Eur J Surgery 1994;160:17-25.

The choice of strategy in the treatment of intermittent claudication - a decision tree approach Troëng T, Bergqvist D, Janzon L, Jendteg S, Lindgren B.. Eur J Vasc Surg 1993;7:438-443.

Adverse outcomes in surgery for chronic leg ischaemia - risk factors and risk prediction when using different statistical methods Troëng T,Janzon L,Bergqvist D.. Eur J Vasc Surg 1992;6:628-635.

VRISS (Vascular Registry in Southern Sweden): Vascular Surgery in southern Sweden - the first year experience of a vascular registry. Eur J Vasc Surg 1989;3:563-569.

VRISS (Vascular Registry in Southern Sweden): The Vascular Registry – a responsibility for all vascular surgeons ? Eur J Vasc Surg 1987;1:219-226.
